# Supplementary material
Source: publisher site journal article supplement (https://www.dovepress.com/article/380418)
Supplement: Supplementary file 1 [file get_supplementary_file.php]

**
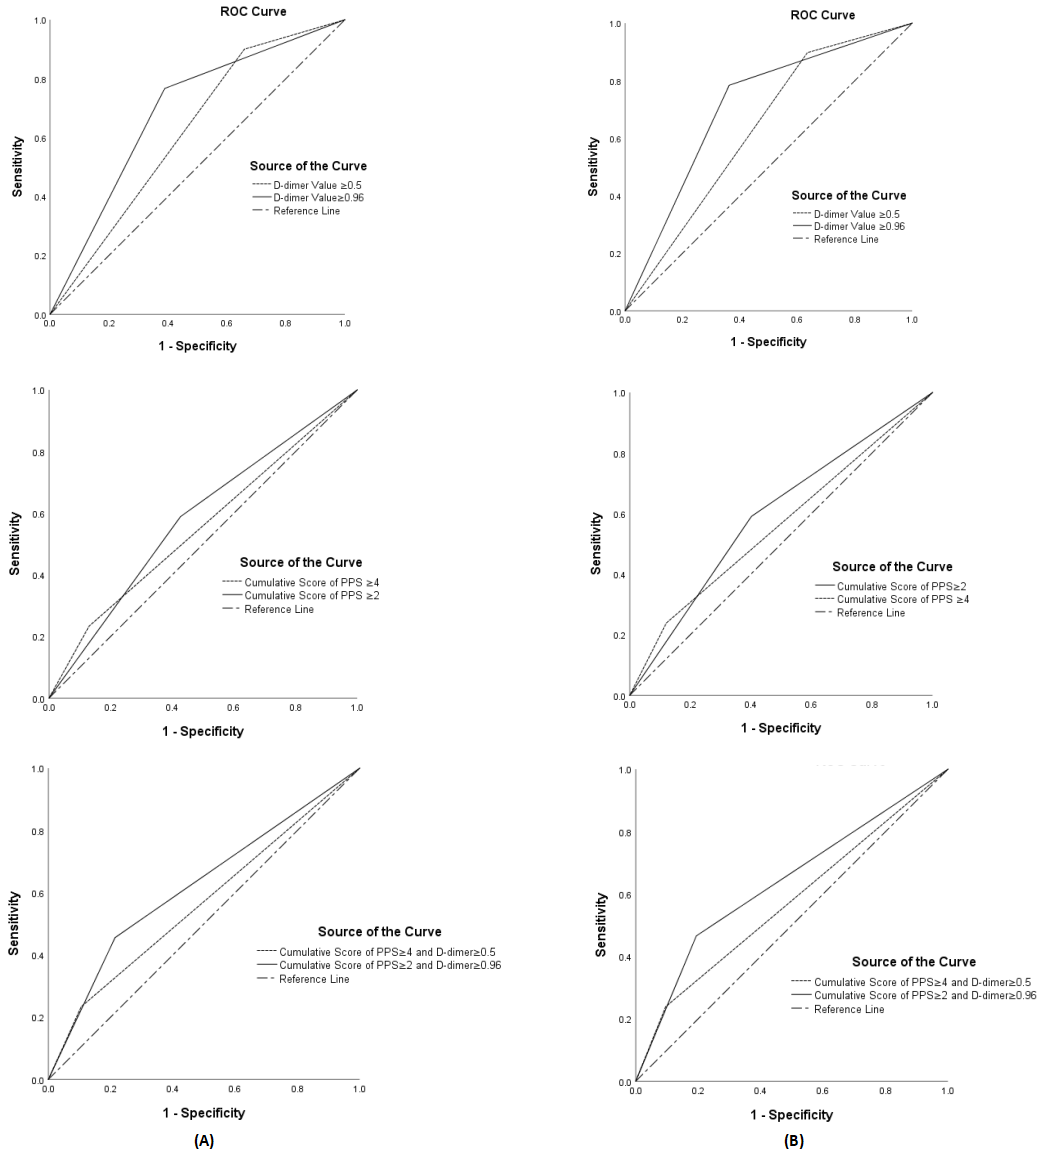
**

**Supplemental Figure 1** Receiver operating characteristic (ROC) curve of the different thresholds of D-dimer (mg/L) and PPS in overall cohort (A) and patients without thromboprophylaxis (B)

**(C)**

**(B)**

**(A)**


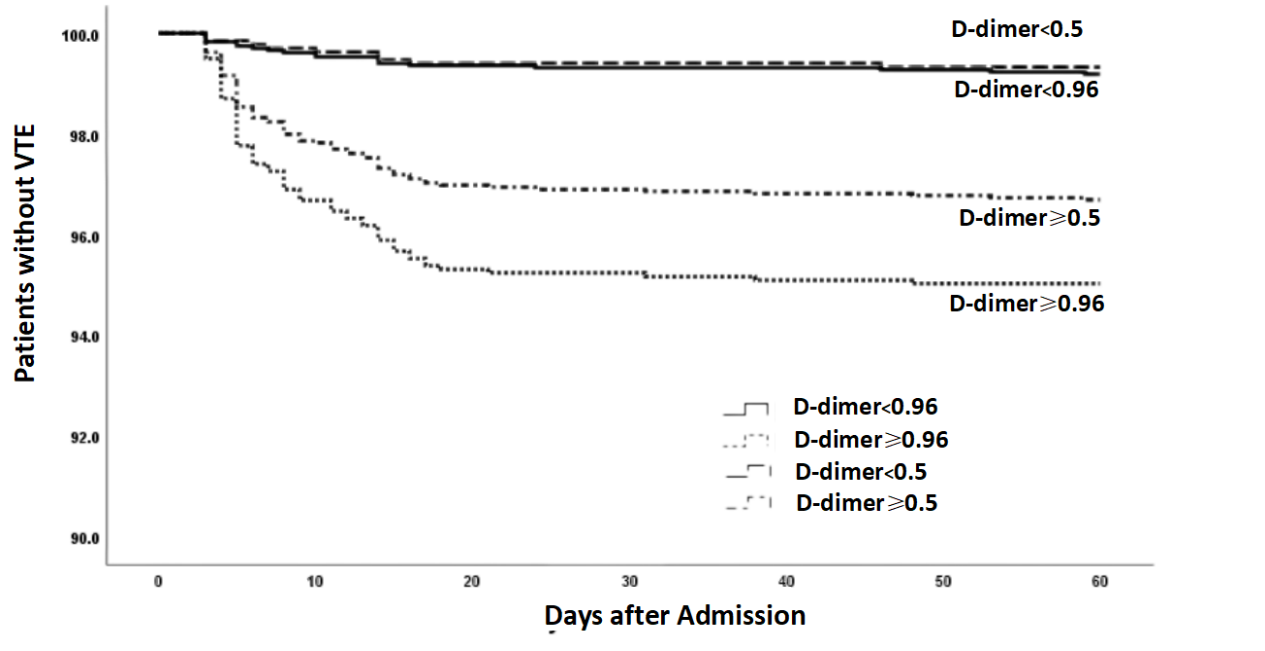

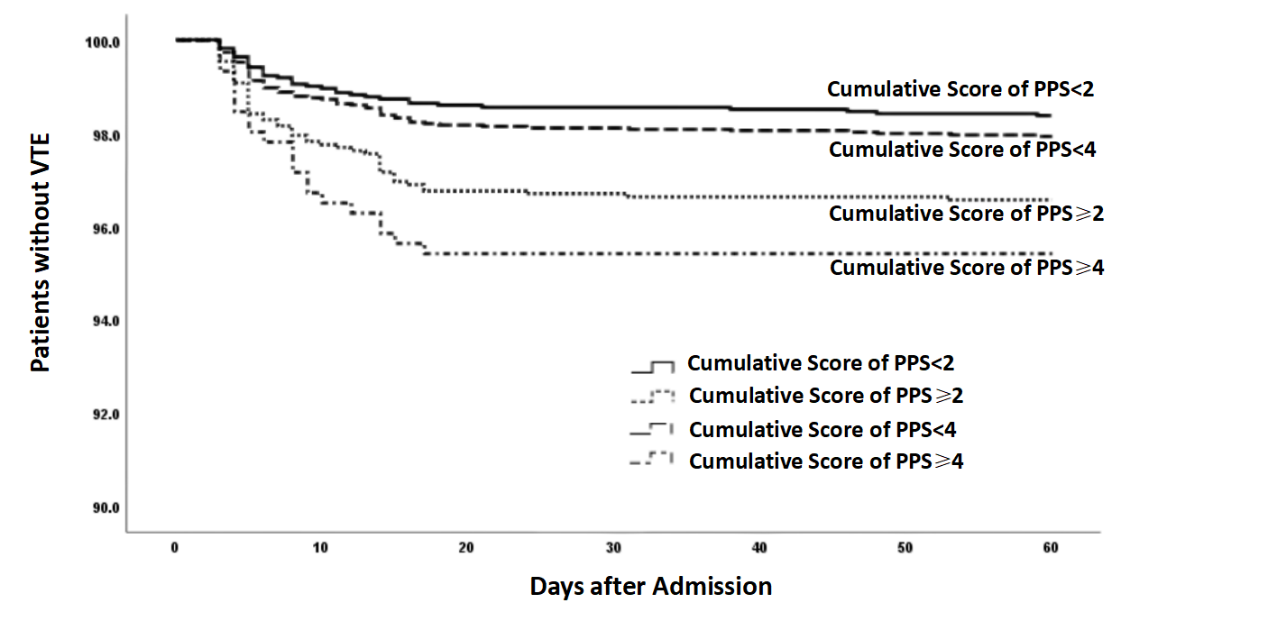

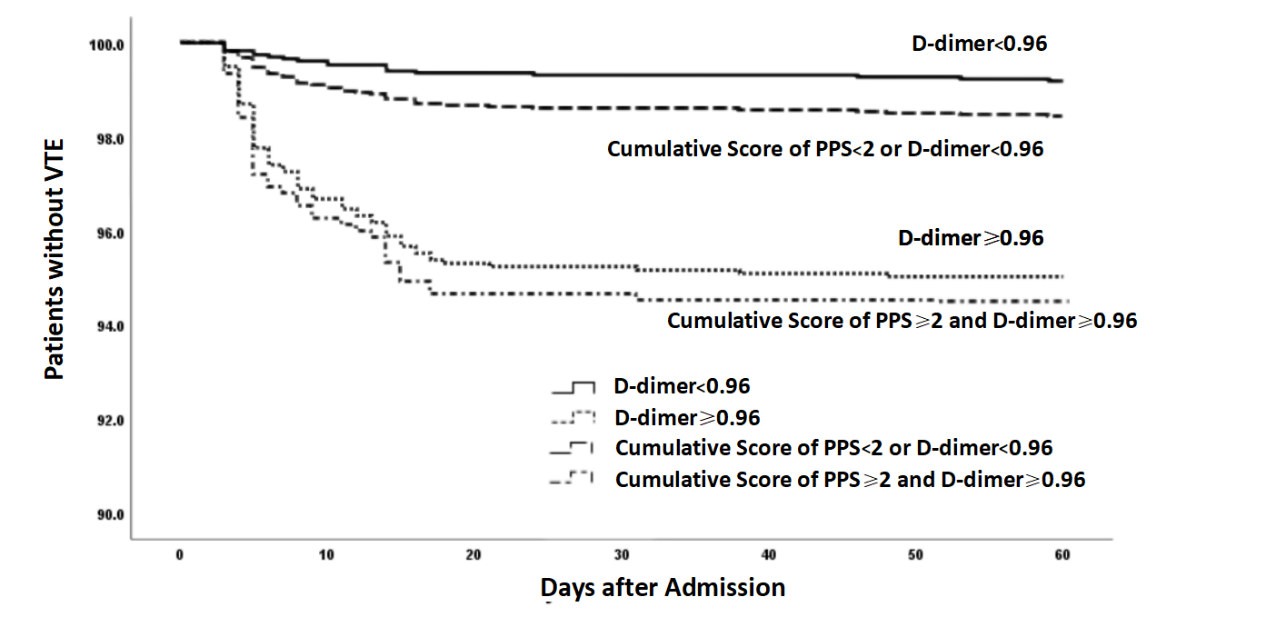


**Supplemental Figure 2** Kaplan–Meier estimates of the absence of VTE in low vs high-risk patients according to different cut-off values of D-dimer (A) and the PPS (B), and the combination of D-dimer and PPS (C) in patients without thromboprophylaxis（VTE= venous thromboembolism; PPS=Padua Prediction Score）
